# Supplementary material
Source: PubMed Central journal article supplement (PMC5860628)
Supplement: kww210monswebmaterialfinal.pdf [file kww210monswebmaterialfinal.pdf]

**Web Table 1. Baseline Characteristics in the Overall Sample and in the Telomere Subsample of ESTHER (2000-2015)**

|                            | Categories      | Overall sample<br>(n=9,949) |            | Telomere subsample<br>(n=3,566) |            |
|----------------------------|-----------------|-----------------------------|------------|---------------------------------|------------|
|                            |                 | n                           | Mean/%     | n                               | Mean/%     |
| <b>Age (years)</b>         | Mean ± SD       | 9,949                       | 62.1 ± 6.6 | 3,566                           | 61.9 ± 6.6 |
| <b>Sex</b>                 | Women           | 5,467                       | 55.0       | 1,977                           | 55.4       |
|                            | Men             | 4,482                       | 45.0       | 1,589                           | 44.6       |
| <b>Education</b>           | ≤ 9 years       | 7,242                       | 74.7       | 2,575                           | 74.0       |
|                            | 10-11 years     | 1,373                       | 14.2       | 532                             | 15.3       |
|                            | ≥12 years       | 1,082                       | 11.1       | 373                             | 10.7       |
| <b>All-cause mortality</b> | Dead            | 1,832                       | 18.4       | 733                             | 20.6       |
|                            | Alive           | 8,116                       | 81.6       | 2,833                           | 79.4       |
| <b>CVD mortality</b>       | CVD-death       | 584                         | 5.9        | 232                             | 6.5        |
|                            | No CVD-death    | 9364                        | 94.1       | 3,334                           | 93.5       |
| <b>Cancer mortality</b>    | Cancer death    | 640                         | 6.4        | 253                             | 7.1        |
|                            | No cancer death | 9308                        | 93.6       | 3,313                           | 92.9       |

**Web Table 2. Association of LTL with All-cause Mortality in the Nurses' Health Study (1989-2010) and ESTHER (2000-2015)**

| <b>Nurses' Health Study</b> |                |                       |               |                       |               |                       |               |                       |               |
|-----------------------------|----------------|-----------------------|---------------|-----------------------|---------------|-----------------------|---------------|-----------------------|---------------|
| <b>Telomere Length</b>      | <b>N/Cases</b> | <b>HR<sup>a</sup></b> | <b>95% CI</b> | <b>HR<sup>b</sup></b> | <b>95% CI</b> | <b>HR<sup>c</sup></b> | <b>95% CI</b> | <b>HR<sup>d</sup></b> | <b>95% CI</b> |
| <b>Quintiles of z-score</b> |                |                       |               |                       |               |                       |               |                       |               |
| <b>1 (shortest)</b>         | 1725/494       | 1.37                  | 1.20, 1.56    | 1.17                  | 1.02, 1.33    | 1.09                  | 0.95, 1.25    | 1.00                  | 0.85, 1.18    |
| <b>2</b>                    | 1728/447       | 1.21                  | 1.05, 1.38    | 1.08                  | 0.94, 1.24    | 1.01                  | 0.87, 1.16    | 0.95                  | 0.80, 1.19    |
| <b>3</b>                    | 1721/418       | 1.12                  | 0.97, 1.28    | 1.03                  | 0.90, 1.19    | 0.98                  | 0.85, 1.13    | 1.01                  | 0.85, 1.20    |
| <b>4</b>                    | 1726/410       | 1.12                  | 0.97, 1.29    | 1.07                  | 0.93, 1.23    | 1.05                  | 0.90, 1.21    | 1.01                  | 0.85, 1.20    |
| <b>5 (longest)</b>          | 1733/380       | Ref.                  |               | Ref.                  |               | Ref.                  |               | Ref.                  |               |
| <b>z-score (continuous)</b> | 8633/2149      | 0.90                  | 0.86, 0.94    | 0.95                  | 0.91, 0.99    | 0.97                  | 0.93, 1.01    | 0.99                  | 0.94, 1.05    |
| <b>z-score &lt; median</b>  | 4316/1125      | 1.12                  | 1.03, 1.22    | 1.03                  | 0.94, 1.12    | 0.98                  | 0.90, 1.08    | 0.94                  | 0.84, 1.04    |
| <b>z-score ≥ median</b>     | 4317/1024      | Ref.                  |               | Ref.                  |               | Ref.                  |               | Ref.                  |               |
| <b>ESTHER</b>               |                |                       |               |                       |               |                       |               |                       |               |
| <b>Telomere Length</b>      | <b>N/Cases</b> | <b>HR<sup>a</sup></b> | <b>95% CI</b> | <b>HR<sup>b</sup></b> | <b>95% CI</b> | <b>HR<sup>c</sup></b> | <b>95% CI</b> | <b>HR<sup>d</sup></b> | <b>95% CI</b> |
| <b>Quintiles of z-score</b> |                |                       |               |                       |               |                       |               |                       |               |
| <b>1 (shortest)</b>         | 700/133        | 2.11                  | 1.55, 2.87    | 1.43                  | 1.05, 1.95    | 1.14                  | 0.81, 1.61    | 1.17                  | 0.81, 1.69    |
| <b>2</b>                    | 734/169        | 1.92                  | 1.46, 2.51    | 1.37                  | 1.04, 1.80    | 1.28                  | 0.95, 1.72    | 1.33                  | 0.97, 1.83    |
| <b>3</b>                    | 693/150        | 1.49                  | 1.14, 1.93    | 1.18                  | 0.91, 1.54    | 1.16                  | 0.87, 1.54    | 1.20                  | 0.89, 1.63    |
| <b>4</b>                    | 744/162        | 1.31                  | 1.02, 1.68    | 1.11                  | 0.87, 1.43    | 1.11                  | 0.85, 1.45    | 1.14                  | 0.86, 1.52    |
| <b>5 (longest)</b>          | 694/119        | Ref.                  |               | Ref.                  |               | Ref.                  |               | Ref.                  |               |
| <b>z-score (continuous)</b> | 3566/733       | 0.74                  | 0.67, 0.83    | 0.87                  | 0.78, 0.97    | 0.92                  | 0.82, 1.03    | 0.93                  | 0.82, 1.05    |
| <b>z-score &lt; median</b>  | 1790/383       | 1.48                  | 1.25, 1.76    | 1.21                  | 1.02, 1.45    | 1.15                  | 0.95, 1.39    | 1.17                  | 0.95, 1.43    |
| <b>z-score ≥ median</b>     | 1776/350       | Ref.                  |               | Ref.                  |               | Ref.                  |               | Ref.                  |               |

HR, hazard ratio; 95% CI, 95% confidence interval; Ref., reference category

<sup>a</sup> crude model, only adjusted for batch effect (random effect)

<sup>b</sup> like model 1, but additionally adjusted for age (and sex in ESTHER)

<sup>c</sup> like model 2, but additionally adjusted for smoking status, body mass index, physical activity, alcohol consumption and education

<sup>d</sup> like model 3, but additionally adjusted for systolic blood pressure, total cholesterol, history of diabetes, cancer, stroke and coronary heart disease.

**Web Table 3. Association of LTL with CVD Mortality in the Nurses' Health Study (1989-2010) and ESTHER (2000-2015)**

| <b>Nurses' Health Study</b> |                |                       |               |                       |               |                       |               |                       |               |
|-----------------------------|----------------|-----------------------|---------------|-----------------------|---------------|-----------------------|---------------|-----------------------|---------------|
| <b>Telomere Length</b>      | <b>N/Cases</b> | <b>HR<sup>a</sup></b> | <b>95% CI</b> | <b>HR<sup>b</sup></b> | <b>95% CI</b> | <b>HR<sup>c</sup></b> | <b>95% CI</b> | <b>HR<sup>d</sup></b> | <b>95% CI</b> |
| <b>Quintiles of z-score</b> |                |                       |               |                       |               |                       |               |                       |               |
| <b>1 (shortest)</b>         | 1725/139       | 1.29                  | 1.01, 1.66    | 1.09                  | 0.85, 1.39    | 1.00                  | 0.76, 1.30    | 0.85                  | 0.62, 1.16    |
| <b>2</b>                    | 1728/105       | 0.94                  | 0.72, 1.23    | 0.84                  | 0.64, 1.09    | 0.78                  | 0.59, 1.04    | 0.64                  | 0.46, 0.89    |
| <b>3</b>                    | 1721/99        | 0.90                  | 0.69, 1.18    | 0.84                  | 0.64, 1.11    | 0.76                  | 0.57, 1.02    | 0.75                  | 0.54, 1.05    |
| <b>4</b>                    | 1726/114       | 1.06                  | 0.81, 1.37    | 1.01                  | 0.78, 1.32    | 0.93                  | 0.70, 1.23    | 0.78                  | 0.57, 1.09    |
| <b>5 (longest)</b>          | 1733/111       | Ref.                  |               | Ref.                  |               | Ref.                  |               | Ref.                  |               |
| <b>z-score (continuous)</b> | 8633/568       | 0.93                  | 0.86, 1.01    | 0.99                  | 0.92, 1.08    | 1.01                  | 0.92, 1.11    | 1.08                  | 0.97, 1.20    |
| <b>z-score &lt; median</b>  | 4316/282       | 0.99                  | 0.84, 1.17    | 0.90                  | 0.76, 1.06    | 0.88                  | 0.74, 1.05    | 0.79                  | 0.64, 0.97    |
| <b>z-score ≥ median</b>     | 4317/286       | Ref.                  |               | Ref.                  |               | Ref.                  |               | Ref.                  |               |
| <b>ESTHER</b>               |                |                       |               |                       |               |                       |               |                       |               |
| <b>Telomere Length</b>      | <b>N/Cases</b> | <b>HR<sup>a</sup></b> | <b>95% CI</b> | <b>HR<sup>b</sup></b> | <b>95% CI</b> | <b>HR<sup>c</sup></b> | <b>95% CI</b> | <b>HR<sup>d</sup></b> | <b>95% CI</b> |
| <b>Quintiles of z-score</b> |                |                       |               |                       |               |                       |               |                       |               |
| <b>1 (shortest)</b>         | 700/43         | 2.84                  | 1.64, 4.91    | 1.74                  | 1.01, 3.02    | 1.32                  | 0.73, 2.40    | 1.16                  | 0.61, 2.18    |
| <b>2</b>                    | 734/48         | 2.15                  | 1.32, 3.53    | 1.46                  | 0.89, 2.41    | 1.24                  | 0.73, 2.12    | 1.07                  | 0.59, 1.92    |
| <b>3</b>                    | 693/53         | 1.98                  | 1.24, 3.15    | 1.49                  | 0.93, 2.39    | 1.45                  | 0.87, 2.41    | 1.33                  | 0.78, 2.27    |
| <b>4</b>                    | 744/55         | 1.62                  | 1.03, 2.53    | 1.33                  | 0.85, 2.08    | 1.30                  | 0.80, 2.11    | 1.27                  | 0.76, 2.13    |
| <b>5 (longest)</b>          | 694/33         | Ref.                  |               | Ref.                  |               | Ref.                  |               | Ref.                  |               |
| <b>z-score (continuous)</b> | 3566/232       | 0.70                  | 0.59, 0.85    | 0.85                  | 0.71, 1.02    | 0.92                  | 0.76, 1.11    | 0.97                  | 0.79, 1.19    |
| <b>z-score &lt; median</b>  | 1790/120       | 1.56                  | 1.15, 2.10    | 1.22                  | 0.90, 1.65    | 1.15                  | 0.83, 1.59    | 1.09                  | 0.76, 1.56    |
| <b>z-score ≥ median</b>     | 1776/112       | Ref.                  |               | Ref.                  |               | Ref.                  |               | Ref.                  |               |

HR, hazard ratio; 95% CI, 95% confidence interval; Ref., reference category

<sup>a</sup> crude model, only adjusted for batch effect (random effect)

<sup>b</sup> like model 1, but additionally adjusted for age (and sex in ESTHER)

<sup>c</sup> like model 2, but additionally adjusted for smoking status, body mass index, physical activity, alcohol consumption and education

<sup>d</sup> like model 3, but additionally adjusted for systolic blood pressure, total cholesterol, history of diabetes, cancer, stroke and coronary heart disease.

**Web Table 4. Association of LTL with Cancer Mortality in the Nurses' Health Study (1989-2010) and ESTHER (2000-2015)**

| <b>Nurses' Health Study</b> |                |                       |                   |                       |               |                       |               |                       |               |
|-----------------------------|----------------|-----------------------|-------------------|-----------------------|---------------|-----------------------|---------------|-----------------------|---------------|
| <b>Telomere Length</b>      | <b>N/Cases</b> | <b>HR<sup>a</sup></b> | <b>95% CI</b>     | <b>HR<sup>b</sup></b> | <b>95% CI</b> | <b>HR<sup>c</sup></b> | <b>95% CI</b> | <b>HR<sup>d</sup></b> | <b>95% CI</b> |
| <b>Quintiles of z-score</b> |                |                       |                   |                       |               |                       |               |                       |               |
| <b>1 (shortest)</b>         | 1725/183       | 1.17                  | 0.95, 1.45        | 1.04                  | 0.84, 1.28    | 1.01                  | 0.81, 1.26    | 0.95                  | 0.73, 1.24    |
| <b>2</b>                    | 1728/169       | 1.08                  | 0.87, 1.34        | 0.99                  | 0.80, 1.23    | 0.93                  | 0.74, 1.17    | 0.90                  | 0.69, 1.18    |
| <b>3</b>                    | 1721/184       | 1.15                  | 0.93, 1.42        | 1.09                  | 0.88, 1.32    | 1.05                  | 0.84, 1.31    | 1.09                  | 0.84, 1.41    |
| <b>4</b>                    | 1726/158       | 1.02                  | 0.82, 1.27        | 0.99                  | 0.79, 1.23    | 1.00                  | 0.80, 1.26    | 1.00                  | 0.76, 1.31    |
| <b>5 (longest)</b>          | 1733/164       | Ref.                  |                   | Ref.                  |               | Ref.                  |               | Ref.                  |               |
| <b>z-score (continuous)</b> | 8633/858       | 0.95                  | 0.89, 1.01        | 0.99                  | 0.93, 1.06    | 1.00                  | 0.93, 1.08    | 1.03                  | 0.94, 1.13    |
| <b>z-score &lt; median</b>  | 4316/437       | 1.05                  | 0.92, 1.21        | 0.99                  | 0.86, 1.13    | 0.94                  | 0.82, 1.08    | 0.91                  | 0.77, 1.08    |
| <b>z-score ≥ median</b>     | 4317/421       | Ref.                  |                   | Ref.                  |               | Ref.                  |               | Ref.                  |               |
| <b>ESTHER</b>               |                |                       |                   |                       |               |                       |               |                       |               |
| <b>Telomere Length</b>      | <b>N/Cases</b> | <b>HR<sup>a</sup></b> | <b>95% CI</b>     | <b>HR<sup>b</sup></b> | <b>95% CI</b> | <b>HR<sup>c</sup></b> | <b>95% CI</b> | <b>HR<sup>d</sup></b> | <b>95% CI</b> |
| <b>Quintiles of z-score</b> |                |                       |                   |                       |               |                       |               |                       |               |
| <b>1 (shortest)</b>         | 700/50         | <b>1.92</b>           | <b>1.15, 3.18</b> | 1.40                  | 0.84, 2.33    | 1.21                  | 0.70, 2.09    | 1.52                  | 0.85, 2.72    |
| <b>2</b>                    | 734/56         | <b>1.65</b>           | <b>1.05, 2.61</b> | 1.26                  | 0.79, 2.00    | 1.27                  | 0.78, 2.07    | 1.56                  | 0.93, 2.62    |
| <b>3</b>                    | 693/51         | 1.37                  | 0.88, 2.13        | 1.14                  | 0.73, 1.78    | 1.25                  | 0.79, 1.99    | 1.50                  | 0.91, 2.47    |
| <b>4</b>                    | 744/53         | 1.18                  | 0.78, 1.80        | 1.04                  | 0.69, 1.59    | 1.03                  | 0.66, 1.61    | 1.27                  | 0.79, 2.04    |
| <b>5 (longest)</b>          | 694/43         | Ref.                  |                   | Ref.                  |               | Ref.                  |               | Ref.                  |               |
| <b>z-score (continuous)</b> | 3566/253       | <b>0.79</b>           | <b>0.67, 0.94</b> | 0.90                  | 0.75, 1.07    | 0.93                  | 0.78, 1.12    | 0.89                  | 0.73, 1.09    |
| <b>z-score &lt; median</b>  | 1790/136       | <b>1.50</b>           | <b>1.12, 2.01</b> | 1.28                  | 0.95, 1.73    | 1.27                  | 0.92, 1.74    | 1.31                  | 0.93, 1.84    |
| <b>z-score ≥ median</b>     | 1776/117       | Ref.                  |                   | Ref.                  |               | Ref.                  |               | Ref.                  |               |

HR, hazard ratio; 95% CI, 95% confidence interval; Ref., reference category

<sup>a</sup> crude model, only adjusted for batch effect (random effect)

<sup>b</sup> like model 1, but additionally adjusted for age (and sex in ESTHER)

<sup>c</sup> like model 2, but additionally adjusted for smoking status, body mass index, physical activity, alcohol consumption and education

<sup>d</sup> like model 3, but additionally adjusted for systolic blood pressure, total cholesterol, history of diabetes, cancer, stroke and coronary heart disease.

**Web Table 5. Summary Estimates of Association of LTL with Mortality From Fixed-Effects Meta-Analysis (Nurses' Health Study (1989-2010) and ESTHER (2000-2015))**

| <b>All-cause mortality</b>  |          |              |                       |               |                |                       |               |                |                       |               |                |
|-----------------------------|----------|--------------|-----------------------|---------------|----------------|-----------------------|---------------|----------------|-----------------------|---------------|----------------|
| <b>Telomere Length</b>      | <b>n</b> | <b>Cases</b> | <b>HR<sup>a</sup></b> | <b>95% CI</b> | <b>P value</b> | <b>HR<sup>b</sup></b> | <b>95% CI</b> | <b>P value</b> | <b>HR<sup>d</sup></b> | <b>95% CI</b> | <b>P value</b> |
| <b>Quintiles of z-score</b> |          |              |                       |               |                |                       |               |                |                       |               |                |
| <b>1 (shortest)</b>         | 2425     | 627          | 1.46                  | 1.30, 1.65    | <0.001         | 1.21                  | 1.07, 1.37    | 0.003          | 1.10                  | 0.97, 1.25    | 0.156          |
| <b>2</b>                    | 2462     | 616          | 1.33                  | 1.18, 1.50    | <0.001         | 1.13                  | 1.00, 1.28    | 0.047          | 1.06                  | 0.93, 1.20    | 0.405          |
| <b>3</b>                    | 2414     | 568          | 1.19                  | 1.05, 1.35    | 0.005          | 1.06                  | 0.94, 1.20    | 0.345          | 1.01                  | 0.89, 1.15    | 0.837          |
| <b>4</b>                    | 2470     | 572          | 1.16                  | 1.03, 1.32    | 0.016          | 1.08                  | 0.96, 1.22    | 0.219          | 1.06                  | 0.93, 1.21    | 0.349          |
| <b>5 (longest)</b>          | 2427     | 499          | Ref.                  |               |                | Ref.                  |               |                | Ref.                  |               |                |
| <b>z-score (continuous)</b> | 12199    | 2882         | 0.87                  | 0.84, 0.91    | <0.001         | 0.94                  | 0.90, 0.98    | 0.002          | 0.96                  | 0.93, 1.00    | 0.065          |
| <b>z-score &lt; median</b>  | 6106     | 1508         | 1.18                  | 1.10, 1.28    | <0.001         | 1.06                  | 0.98, 1.15    | 0.124          | 1.01                  | 0.93, 1.10    | 0.818          |
| <b>z-score ≥ median</b>     | 6093     | 1374         | Ref.                  |               |                | Ref.                  |               |                | Ref.                  |               |                |
| <b>CVD mortality</b>        |          |              |                       |               |                |                       |               |                |                       |               |                |
| <b>Telomere Length</b>      | <b>n</b> | <b>Cases</b> | <b>HR<sup>a</sup></b> | <b>95% CI</b> | <b>P value</b> | <b>HR<sup>b</sup></b> | <b>95% CI</b> | <b>P value</b> | <b>HR<sup>d</sup></b> | <b>95% CI</b> | <b>P value</b> |
| <b>Quintiles of z-score</b> |          |              |                       |               |                |                       |               |                |                       |               |                |
| <b>1 (shortest)</b>         | 2374     | 182          | 1.48                  | 1.18, 1.85    | 0.001          | 1.18                  | 0.94, 1.48    | 0.150          | 1.05                  | 0.82, 1.34    | 0.707          |
| <b>2</b>                    | 2411     | 153          | 1.14                  | 0.90, 1.44    | 0.289          | 0.95                  | 0.75, 1.20    | 0.667          | 0.86                  | 0.67, 1.11    | 0.252          |
| <b>3</b>                    | 2371     | 137          | 1.10                  | 0.87, 1.38    | 0.444          | 0.94                  | 0.76, 1.17    | 0.590          | 0.89                  | 0.69, 1.15    | 0.370          |
| <b>4</b>                    | 2415     | 152          | 1.18                  | 0.94, 1.48    | 0.151          | 1.08                  | 0.86, 1.36    | 0.486          | 1.01                  | 0.79, 1.29    | 0.923          |
| <b>5 (longest)</b>          | 2390     | 144          | Ref.                  |               |                | Ref.                  |               |                | Ref.                  |               |                |
| <b>z-score (continuous)</b> | 11962    | 800          | 0.89                  | 0.83, 0.96    | 0.002          | 0.97                  | 0.90, 1.04    | 0.349          | 0.99                  | 0.91, 1.08    | 0.844          |
| <b>z-score &lt; median</b>  | 5984     | 402          | 1.10                  | 0.95, 1.27    | 0.197          | 0.97                  | 0.83, 1.12    | 0.639          | 0.93                  | 0.80, 1.09    | 0.389          |
| <b>z-score ≥ median</b>     | 5978     | 398          | Ref.                  |               |                | Ref.                  |               |                | Ref.                  |               |                |

Table continues on the following page.

| Cancer mortality            |       |       |                 |            |         |                 |            |         |                 |            |         |
|-----------------------------|-------|-------|-----------------|------------|---------|-----------------|------------|---------|-----------------|------------|---------|
| Telomere Length             | n     | Cases | HR <sup>a</sup> | 95% CI     | P value | HR <sup>b</sup> | 95% CI     | P value | HR <sup>d</sup> | 95% CI     | P value |
| <b>Quintiles of z-score</b> |       |       |                 |            |         |                 |            |         |                 |            |         |
| <b>1 (shortest)</b>         | 2345  | 233   | 1.26            | 1.04, 1.53 | 0.021   | 1.09            | 0.89, 1.32 | 0.406   | 1.04            | 0.84, 1.27 | 0.736   |
| <b>2</b>                    | 2370  | 225   | 1.17            | 0.96, 1.42 | 0.120   | 1.03            | 0.85, 1.26 | 0.744   | 0.98            | 0.80, 1.21 | 0.877   |
| <b>3</b>                    | 2334  | 235   | 1.19            | 0.98, 1.44 | 0.078   | 1.10            | 0.91, 1.32 | 0.319   | 1.08            | 0.89, 1.33 | 0.425   |
| <b>4</b>                    | 2375  | 211   | 1.05            | 0.87, 1.28 | 0.605   | 1.00            | 0.82, 1.22 | 0.994   | 1.01            | 0.82, 1.23 | 0.953   |
| <b>5 (longest)</b>          | 2358  | 207   | Ref.            |            |         | Ref.            |            |         | Ref.            |            |         |
| <b>z-score (continuous)</b> | 11783 | 1111  | 0.93            | 0.88, 0.99 | 0.015   | 0.98            | 0.92, 1.04 | 0.494   | 0.99            | 0.92, 1.06 | 0.764   |
| <b>z-score &lt; median</b>  | 5900  | 573   | 1.12            | 0.99, 1.23 | 0.074   | 1.03            | 0.91, 1.17 | 0.591   | 0.99            | 0.87, 1.12 | 0.822   |
| <b>z-score ≥ median</b>     | 5883  | 538   | Ref.            |            |         | Ref.            |            |         | Ref.            |            |         |

HR, hazard ratio; 95% CI, 95% confidence interval; Ref., reference category

<sup>a</sup> crude model, only adjusted for batch effect (random effect)

<sup>b</sup> like model 1, but additionally adjusted for age (and sex in ESTHER)

<sup>c</sup> like model 2, but additionally adjusted for smoking status, body mass index, physical activity, alcohol consumption and education

<sup>d</sup> like model 3, but additionally adjusted for systolic blood pressure, total cholesterol, history of diabetes, cancer, stroke and coronary heart disease.
